# Supplementary material for: A Novel Proline-Rich Cathelicidin from the Alpaca Vicugna pacos with Potency to Combat Antibiotic-Resistant Bacteria: Mechanism of Action and the Functional Role of the C-Terminal Region
Source: MDPI journal article supplement (doi:10.3390/membranes12050515), 2022-05-12
Supplement: s1 [file s1]

## *Supplementary Materials*

### **A novel proline-rich cathelicidin from the alpaca *Vicugna pacos* with potency to combat antibiotic-resistant bacteria: mechanism of action and the functional role of the C-terminal region**

**Pavel V. Panteleev \*, Victoria N. Safronova, Roman N. Kruglikov, Ilia A. Bolosov, Ivan V. Bogdanov, Tatiana V. Ovchinnikova**

M.M. Shemyakin & Yu.A. Ovchinnikov Institute of Bioorganic Chemistry, the Russian Academy of Sciences, Miklukho-Maklaya str., 16/10, 117997 Moscow, Russia; victoria.saf@ibch.ru (V.N.S.); kruglikov1911@mail.ru (R.N.K.); bolosov@ibch.ru (I.A.B.); contraton@mail.ru (I.V.B.); ovch@ibch.ru (T.V.O.)

\* Correspondence: [ibch@inbox.ru](mailto:ibch@inbox.ru); Tel.: +7-495-335-09-00

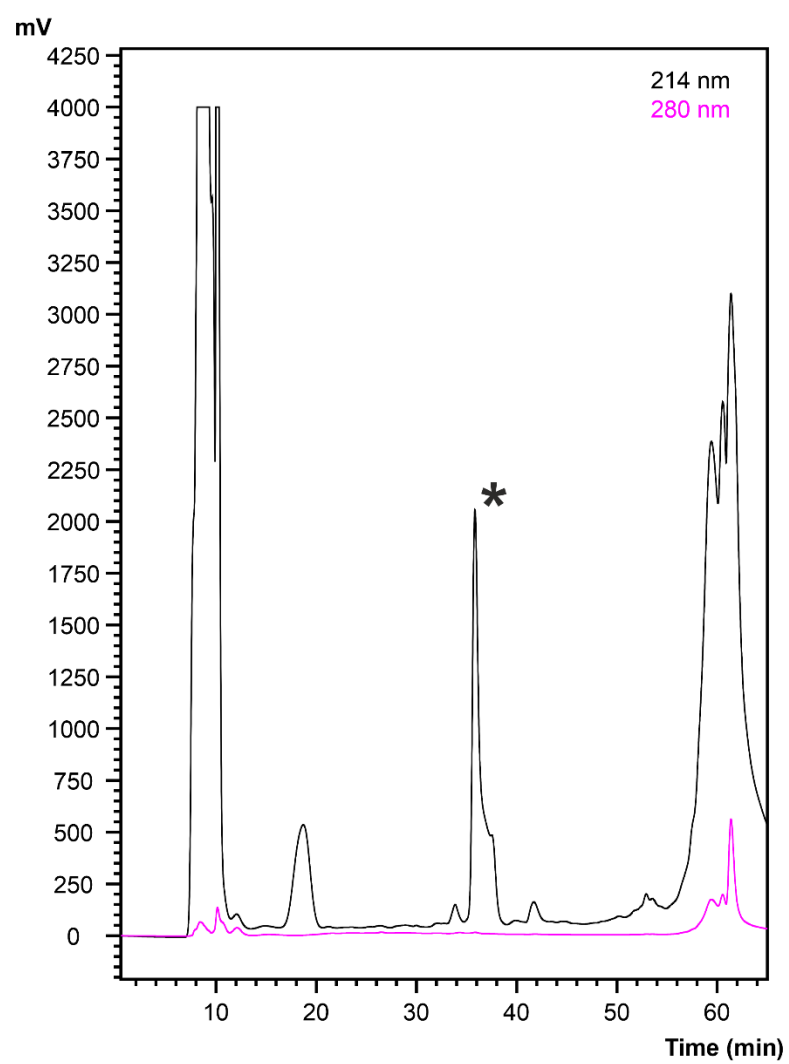

**Figure S1.** Reverse-phase high-performance liquid chromatography (RP-HPLC) purification of the recombinant VicBac[1-22]. The fraction of the target peptide is marked with an asterisk.

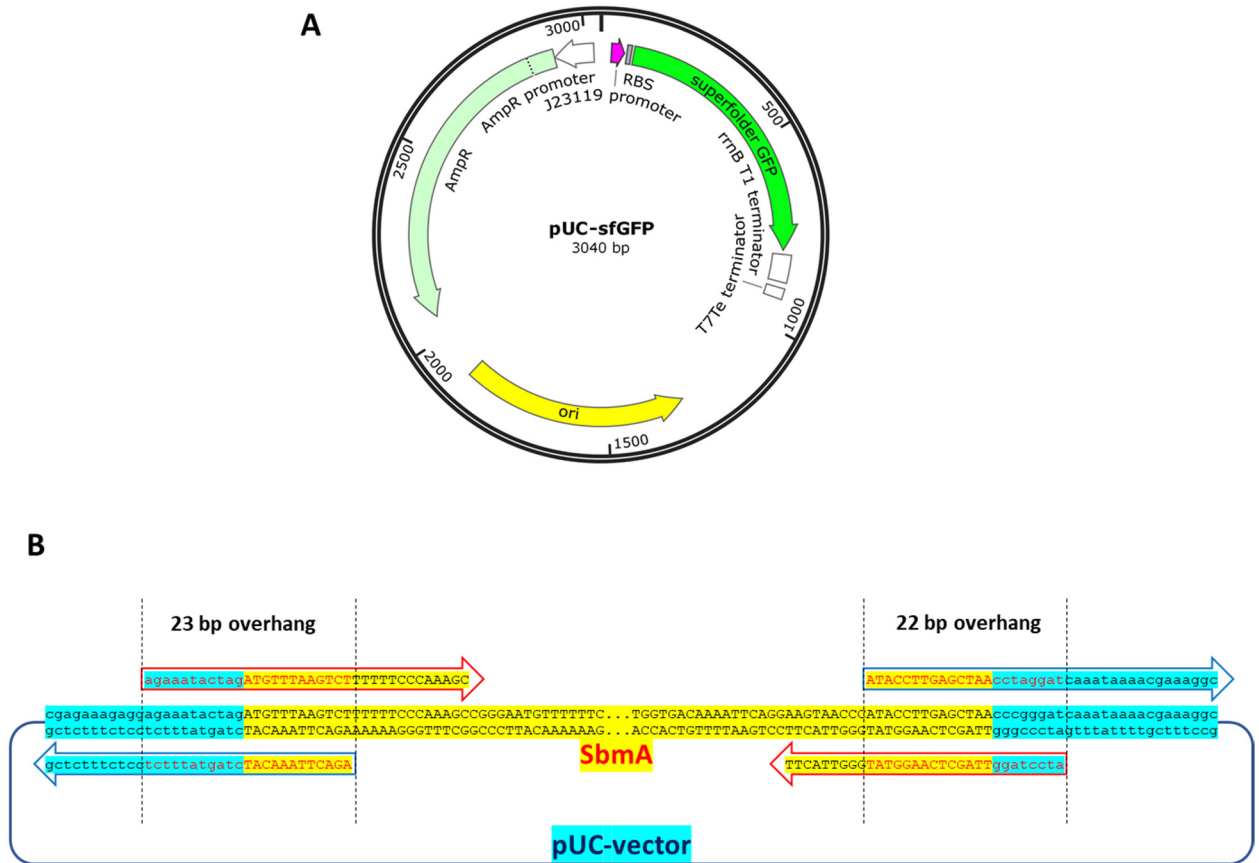

**Figure S2. (A)** Plasmid vector for the expression of sfGFP under the strong constitutive artificial promoter J23119. Map was visualized with SnapGene software. **(B)** The scheme of DNA-amplification, ligase-independent assembly of the complementation plasmids overexpressing SbmA variants in SbmA-deficient *E. coli*.

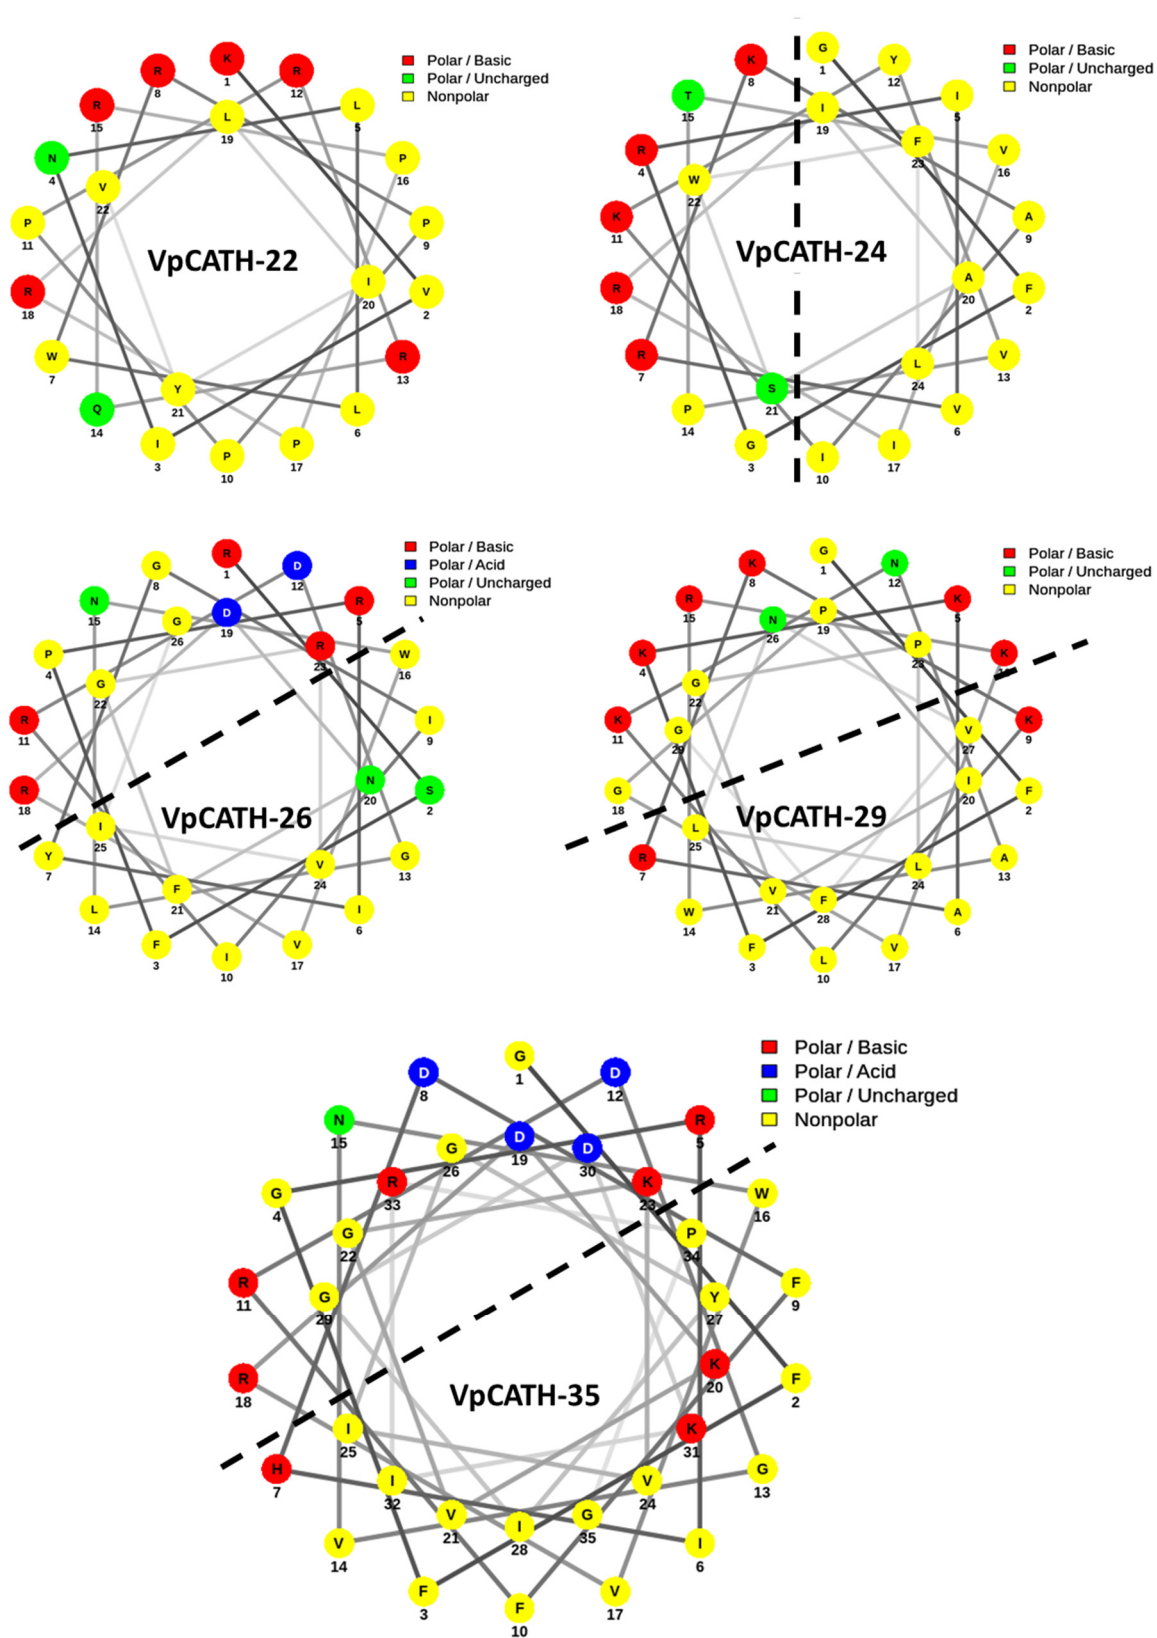

**Figure S3.** Helical wheel projections of alpaca cathelicidins. The projections were generated by online NetWheels tool (<http://lbqp.unb.br/NetWheels/>).

METQRASLSLRWSLWLLLLGLAVPWASA
QALSYREAVLRAVDRLNEQSSDPNLYRLLLELDLPKADEDPDAPKPVSFYTKETV
CPRRTQLPQEQCA  
FKENGVVVK
CLGTVNLYQLRDNFDIT
CNELOSQV
KVINLLWRPPRRRPPRLIYV
(VpCATH-22)

*Vicugna pacos* (JEMW01020494.1)

**METQRASLSLRCSWLWLLLLGLAVPWASA**QALSYREAVLRAVDRLNEQSSDPNLYRLLLELDLPPKADENPDAPKPVSMVMKETVCPRRTQQPPEQCD  
 FKENGVVVKQCLGIVTLDOITGOLAVTCDELOSV**GFGRIVRKAIKYVPTVIRIASWFL** (VpCATH-24)

[illegible]

**Figure S4 (part 1).** Structure of *CATHL* genes and corresponding preprocathecidins of *Vicugna pacos*. Predicted intron/exon boundaries are highlighted in red. Exons are highlighted in green. Signal peptide sequences are marked in yellow/black. Signal peptide sequence identified with SignalP 5.0 ([www.cbs.dtu.dk/services/SignalP/](http://www.cbs.dtu.dk/services/SignalP/)). Peptide sequences of putative mature cathelicidins are marked with red font. The TATA-box signal is in bold and grey marked and the polyadenylation signal is in italics and grey marked.

*Vicugna pacos* (GenBank: ABRR03000981.1)

**METQRDSLSLRWSLWLLLLGLAVPWASA**QALSYREAVLRAVDRLNEQSSDPNLYRLLLELDLPKADEDPDAPKPVSFYTKETVCPRRQTQLPPQQCA  
FKENGVVVKQCLGTVNLYQLRDNFDITCNELQSV**RSFPRIYGIIRDGLNWVRDNFGRVIG** (VpCATH-26)

ggagaggccaagaattttcaggagatggagaaacattttcttcaccttccacagggggcagacctcaccaccgcccagcaatccctgaggcaag  
agcggggcctgaggcaactccagctcacaccctggcggggacagggatggggcaggagggaaggtcctgcttgagcaattgcatcaggcccagg  
ctgagc**ataaaggagggt**cctgtgggctgggacgagggcgaactcgggac**atggagaccagaggacagcctctccctgcccgtggtcactgt**  
**ggctactgctgctgggaactagcgggtgccttggggcagcgcccaggccctgagctataggagggcggtgcttcgagctgtggatcgctcaatgagca**  
**gtcctcagaccccaatctctaccgctcctggagctggacctgcccgaaggct****gt**gagtcggggagggaactggggaggaggcgtctccgcag  
gcttggcctcgtgtccctcccttctgctcgcgtgtacctcctgtcaggaaggcactctccctctaagtgggatccacactctcacagaaatcctc  
ccagagctgggtccctccctgtgtgagagccttctgctggcatctctgctgtgggaacagagccctgacagctcgctcaggctccaggccctcct  
gggggctccaggatagcgtggggtcactggctctgggatgtgacttccctgcttccagtcacctatgcacccattgtctccccaccagggaagg  
ctgtgctcagcctgggggtccagtgacaaggtcttccctgcaggtatccgctgacttccctcagccctccaagaggaggtgcccctcaggagag  
cgggtgtgaggtccctcctgctccctgtgacctggggtcccaggaccaggtgtgtcctactccctctgcacccagcccccagcccagtcgacag  
gaacatgggacaggtctctcaaagggtttgtccttctggggggaggagacaggtcaccgaaggaagcatgagcctgagccagctctccactttga  
tccttgagc**aggagcaggaccagacgcccgaagcctgtgagcttcacagtgaaaggagacgctgtgtccaggaggacacagctgccaccgcagca**  
**gtgtgccttcaaggagaatggg****gt**gaggctgggggcttagggcgctggtgggtgctcccaaggaccgaacaggaggtttgggggtgggtgggt  
agcagctcctggggtgaggagggtgtttatgcctcagggttccagtgtagctgagctcctcccttcc**aggtgggtgaaacagtggttggggacag**  
**tcaacctgtaccagctgaggggacaacttcgatataacatgtaatgag****gt**gagtgaccttgggtcgaggggctgctggtggaggtggtgtgtgga  
acagccttggggcaattccctctgtgcatcctgtagcgcaggaagccctcctccctggctccctcaccgatccacaggtctcctggc  
cgggtctctgcaatcccttagagcagtggttctctcagtgggctcccacttgggaactagagaaaaggctgattctcaggcctcatcagacctac  
ggaagcatgtctgacttgagaccagtaattgtctattttaagagcccttctgggggatgctgactgtgctgaagcttgagtgcactgactagaata  
atagactttctgcccctgctcccatccagcttttctgacatgggtttgtgcccctgggaagcccccttcatcaggaccttggtcctcatctgtc  
tgtgtgagagatgattcaaccacgtgctccaagtgacacagagaaggaggtcaaatgggtgctcaagctccttcggtgggtccaagatggaagattt  
ccaggtggggagggtatcgtgtcttctcctaagtcagtcctcacaagaatcctgtttcttctgtgca**agctccaaagcgtccggtcatttcccc**  
**ggatttatggtatcatccgtgacgggtctgaactgggttcagagataattttggcagagtaatcgga****tag**attgggtgataaaattctccagggtagag  
tcctaattgatcacctaaaactgggtcagtttttcaaactctggaa**ataa**attcttaagaattttaaattcacctgtct

*Vicugna pacos* (GenBank: ABRR03000981.1)

**MDTQRASLSLRWSLWLLLLGLAVPWASIEA**LSYREAVLRAVDRLNEQSSDPNLYRLLLELDLPKAYEDLDAPKPVSFYTKETVCPRRQTQLPPEQCA  
FKENGLVKQCVGTTTLDQVKQGMNIACDELQSI**GFFKKARKKLKNARWKVGPVIGPLLVFG** (VpCATH-29)

cactgcccagcaatccctgaggcaagagcggggcctgaggcaactccagctcacagctggctggggacagggatggggcaggagggaaggtcct  
tgcttgagcaattgcatcaggcccagggtgggc**ataaaggagggt**cctgtgggctaggacgagggcagactcggggacc**atggataaccagagggcca**  
**gcctctccctgggcgctggtcactgtggtactactactgggaactagcagtgcccttgggacagcataggccctgagctataggagggcggtgct**  
**tcgagctgtggatcgctcctcaatgagcagctcctcagaccccaatctctaccgcctcctggagctggacctgcccgaaggct****gt**gagtcggggagg  
gctggggaggaggcgtctccgcagggttggccacactgtccctccctatgctcacgctgtacctcctgtcaggaaggcactctccctctaagt  
gggatccacactctcacagaaatcctccagagctgggtccctctcctgtgagagctctctgctggcatctctgctgtgggaacagagccctga  
cagctcgctcaggcttcaggggctcctgggagctccagggatacgtggggtcactggctctgggatgtgacttccctgcttccactccctgtgca  
cccagtgctctccccaccagggaagagctgtgctcagcctggggttccagtgacaaggtcttccctgcagggtgctccgtgacttccctcagcccc  
tccagggtagggtccctcaggagagcaggtctgagttccctcctgctcctgtgtgctgggatccaggaccaggtgtgtcctcctccctc  
tgcacccagccccagcccaggccaggccacatgggactggctctcaaaggccctgtcctgctggggcaggagacaggtcacacaaaggagcatg  
agcctgaatcagctctcccaactttgatccttcagc**agctacgaggacctagatgccccgaacctgtgagcttcacggtgaaggagacggtgtgtccc**  
**aggaggacacagctgccaccggagcagtggtgccttcaaggagaatggg****gt**gaggctgggggcttagggcgctggtgggtg**[gap61bp]**agacaggt  
caccgaaggaagcatgagcctgagccagctctcccaactttgatccttgagcaggacgaggaccagatgccccgaagcctgtaagctttatgttgaa  
agagacatgtgtcccaggagacacagcagccagcagctgtgcttcaaggagaaagggtgaggtggggcgctggtgagctgctccca  
ggacccaaacaggaggctccaggagaaggcttgacgcccctggggtgaggtgggttagttatgggtcagggttccactgtgacctggaatatcccc  
ttcc**agctgggtgaaacagtggtgtggggacaatcactctggaccaggtcaaggggccaaatgaacatgcctgtgatgag****gt**gagtgagtccttccggg  
ctgcaaggctgctagtggaggtggtgtgtggaacagccttggaccagttccctctgtgcccactccctgtagcggcaggagagccctcctccctg  
gctccccctcaccgagccccagatctccaggtgggtctgcaatcccttagagcagtggttctctcagtgggctccccaccaggacttgtcaga  
aaggcagattgtgttccactgagacctaactgaatcagagctcggggtgggacccagcaactgtatttcaaccagctgaaggggatctgactgtg  
ctaacatttagaggccctcagtagagtaattgggttcccccctgctcctcctgtggttctgggatgggttcgacccagagtagcccttct  
catctctggacctcgatttccctcatctgtgtgtgggtgtagggactcaaccacatgctccaaagtacagccagagggtgaactggggacacaagg  
ctcctgggggttaccaggttaggggaggtgccaggtgtggagatgtctggtctcacctctggttccattcccccattgtaacccggttcttctact  
tcac**agctccagagtattgggttttttaagaaggcacgtaaaaagcttaaaaacgctggcggaagggtggcccaatagttggccggttactcaatg**  
**tatttggg****caa**atcgggagcccattggaagaccctaagggtctgcgggcatgtcctcaagctactggactctgaga**ataa**agctctgtgaaagcaa  
cttccctgagacttcagtttcaattgtctcacctcctccattactgagaccaaactccttaactctggagctgtcctgcgtatgtgtgtgtgtgtg  
ggcgtgtgtgtaactc

**Figure S4 (part 2).** Structure of *CATHL* genes and corresponding preprocathelelids of *Vicugna pacos*. Predicted intron/exon boundaries are highlighted in red. Exons are highlighted in green. Signal peptide sequences are marked in yellow/black. Signal peptide sequence identified with SignalP 5.0 ([www.cbs.dtu.dk/services/SignalP/](http://www.cbs.dtu.dk/services/SignalP/)). Peptide sequences of putative mature cathelids are marked with red font. The TATA-box signal is in bold and grey marked and the polyadenylation signal is in italics and grey marked.

METQRDLSLRRLWLLLLGLAVPWASTEAELSYREAVLRAVDRLNEQSSDPNLYRLLLELDLPKKAEDLDAPKPVSFYVKETVCPRRITQLPPEQCA  
 FKENGVVVKQLGTNLYQLRDNYDITCNELOSVGFFGRIHDFFRDGVNVVRDKVGKIVIGYIGDKIRPG (VpCATH-35)

**METQRASLSLRRLWILLGLAVPWASA**QALSYREAVLRAVDRLNEQSSDPNLYRLLLELDLPPKAEDLDAPKPVSFYTKETVCPRRQLPPEQCD  
 FKEKGVVVKLCIGTVDLDQVDQDIDISCNKLQSV**RRFFPRFPFPGPFPPFPPIPPIPFPFPGPIIR**GRR (VpCATH-38)

atgatggagaaacatttcttcaccttgcacaggagcagacctcaccactgccagcaatcccttgaggcaagagcggggcctgaggcaagtccagc  
tcacacctggccgggggcagggatggggcaggtggggaaggctcctgcttgagcaattgcatcaggcccaggctgagc**ataaa**gggggtcctgtg  
ggctgggaggtggcagactcggggacc**atggagacccagaggccagccttccctcgccgcgtggtcactgtggatactgctgctgggaatagcgg**  
**tgccttggggcagccagccagccctgagctatagggaggcggtgcttcgagctgtggatcgctc**aatgagcagctcctcagaccccaatctctaccg  
**ctccctggagctggacctgcgcgcccaaggct****gt**gagtcgggaggggctgggagggggcgctcccgccagcttggccacactgctccctccctt  
tgctcgcgctgatacctcctgtcaggaaggcacctcctcccttaagtggaatcccactctcacagaaatcctccagagctgggtccctcccgcttg  
tgagagcctctgcttggcatctctgctgtgggaacagagccctgacagcccgctcaggctccagggactcctgggagctccagggatacgttgggc  
tcactggctcctgggatgtgacttccctgcttccagtccctgtgcacccagtgctccccaccagggaagggtgtgctcagcttaggggttccag  
tgactaggtcttccctgcaggtgtccctgacttccctcagccctccaaaggaggggtgccctcaggagaggggctgaggtccctctctct  
ccctgtactctggagcccaaggtccaggtgtgtctcttccctctgctccagcccccagccagggccaggcacatgggacggctcttcaaga  
gggctgttctgctgtggggaagggaagcaggtcacccaaggaagcatgagcctgagccagctccccacttgatccttcagc**aggacaggagccta**  
**gatgccccaaagcctgtgagcttcacggtgaaggagacggtgtgtcccaggaggacacagctgccaccggagcagtgtagcttcaaggagaaagg****g**  
**tg**aggtctgggagctgtgaacgcttgcgcggaatgcgtcccaaggaccgcgaacaagaggtccgggaggggtggttagcagccctgggggtgaggtctgtgt  
ttatggctcagggatcttaactgtgaactagaggttctctt**tcagggtgaaactgtgttggggacagctcactctggaccaggttcgaagccaaa**  
**tagacatcagttgtaataag****gt**gagtgccctctctgttttagctgctccgggagagcgctggaaacatcattggaccagtttgttcttctca  
ttcagggtctccacccctggctcccccatcacctgagcccaagtccccagctgggctctgcaatcccttagagcagtggttgttctctaagtggc  
attctcacctgggaactagatgaaaggcaggttcttagtccacattcagacctactgagacaaagtgggggtgggtcccagaaatttgtatttaa  
gaagccctcctgggattctgactgtgctgaagtttgagaggcactgactacagtaaatgggattctgctcctgctctgtcagctgtggtggcca  
gtgactcggggaggccttggcatctgtgcttggttttctcatctgtgctatgggtagggattcaaccacatgctccaacttatagccacagg  
gtgaatgggacccaagcctccaggagtggtcctcaggagtaggattgtgagaagggaacctgattcatttgattcaggatcagactctgacaagaagcc  
tgtttcttctggttcac**agctccagagtgaaggcgattttttccacgaccatttccacctggacccttccatttccccctttccaccaatccc**  
**ccctataccaccatttccatttctgggcogatttatagaggacgacgg****tga**aggattggctgatccttggccatcagaggattctgttgaattgt  
gagccagggaagtccaaagggtctcttcttatctggctcagtggttcagattctgaa**ataa**attgttctgaaacaacttctccaggtatctccc  
acttactgtgaccaggtcctaaactctgggagccgagtggtgtgtgggtgtgtgcaagcgtgtgttgcgtgtgtgtgatcagtgatgtggtca  
tttcqgtgcga

**Figure S4 (part 3).** Structure of *CATHL* genes and corresponding preprocathecidins of *Vicugna pacos*. Predicted intron/exon boundaries are highlighted in red. Exons are highlighted in green. Signal peptide sequences are marked in yellow/black. Signal peptide sequence identified with SignalP 5.0 ([www.cbs.dtu.dk/services/SignalP/](http://www.cbs.dtu.dk/services/SignalP/)). Peptide sequences of putative mature cathelicidins are marked with red font. The TATA-box signal is in bold and grey marked and the polyadenylation signal is in italics and grey marked.

METQRDLSLSRRWSLWLLLLGLAVPWASA QALSYREAVLRAVDRLNEQSSDPNLYRLLLELDLPKKADEDPDAPKPVSFYVKETV CPKRTQQPPEQCA  
 FKENGVVVKQCVGTVTLDSRDOODITCDELSQVRRIRRRPRLPRPRVPRPRIPPRIPRVLPPPPRVFPFPRFPRGR (VicBac)

*Vicugna pacos* (GenBank: ABRR03000981.1)

gcaatccccctgaggcaagagcggggccttaggcaagctccagctcacacccctggccgggggcagggatggggcaggtggggaaggctcctgcttgagc  
aatgtcatcaggccacaggctgagc**ataaa**ggagggtcctgtgggtctgggaaggcagactcggggacc**at**ggaaaccaagaggccagcctctcc**c**  
**tgcgcgcgttggtcactgtggtcactgtcgtctgggactagcgggtccttgggccaagtgccaggccctgagctatagggagggcggtgtctcgagctgt**  
**ggatcgccctcaatgagcagctctcagaccccaatctacccgctcctggagctggacactgccgcccaaggct****gt**gagtcggggagggtctgggaag  
ggaggcgctctccgcaggcttgccacacactgtccctcccttgtctcgctgtacctctgtcaggaagggtcctctccctctcaagtgggatccca  
cctctcacagaaatcctcctagagctgggtccctcccgcttctgagagcctcttgcctggcatctctgctgtgggaacagagccctgacagctcgct  
caggctccaggggcctcctgggggctccagggatacagttgggtcactggctcttgggtgtgacttccctgcttcagtcctcctgtgcaccccatgt  
ctcccaatatagggaagggtctgtcctcagctggatgttccagtgacaaggtcttccccctcagggtgtccctgacttccctcactctgtctaaggggg  
agctgccctcaggagagcgggtctgaggtccctctcgtctcctgtgccttgagccaggaacaggtgtgtctcctcctctctgtgcaccag  
cccgacgtccaggccaggccagcatgggagggttgtcaagggggctgtcctgctgggggcagggaagataggtcatcaaggaagtatgagcctgagcc  
agtctccccactttgatccttgagc**ag**gaccaggagaccagatgccccaaagcctgtgagcttcaagggtgaaggagaccgtgtgtcccaggaggac**c**  
**aggagccacctgagcagtggtgtccttcaagaagaatggg****gt**gaggtctgggggcactggcggatgctcccaaggacctgaataggagtgctcaagaa  
gccttgacgccccctggggtgagggtgggtgtgtggttcagggtctcagctcagctggaggtctccccctct**ag**ctggtgaaacagtggtgtgggg  
**acagtcactctggacagctccaaggacccaacaggacacactgtgataaagg****gt**aatgactccttgggtgtaggggctgtgtgaggatgggg  
tgtggaacatcttcttgacaattccctctgtgcacactttaaggggggaaatctcctccctggctccccctcaccagacccaggctctc  
caggctgggctctggtatcccttatagcagtggtctctcagtgctctccccacttgaaactagagaaaacggctgattctctggccccagtgaga  
tctacccaattagttggagtggtgcccagcaattctattttaaggctctcctggcatcctgactactgaacgacactgactagagtatggaact  
tgtgtccccctgtccccacagcttctgtggatgggtctgtggccctgggaaggcccttatcactctggaaccagtgctcctcatctgtgctggg  
tgagtgatatgtcctaatgtcacaggcagagtggaactggggcccaaggttctcctgagtcacactggaaagtgggtcagtgtagagaaaggcg  
cttgtgattgtggccagtgtagtacaagaaaacttcttcttgatccac**ag**gccccggagatctcgccgctaccctttctatcgccggaggtataccag  
**gcagagtttccctccgccaatttccctccgccaatttccctcctctgagtttccctccaccaaatttccctccgccaatttccctcctcctcgg**  
**tttctccgccaatttccctccgccaatttccctcctcctgagtttctctgcaaaatttccccccaccctct****ca**attaccctgccaaatttgc  
atccccacagccctccaagattgtctacaagaagtgaaagattcacagataactcgtgtataaggcatttagcggaatcagaagccggggaga  
ctctaaaggtctgtcttgcctcctgagctcagagatttaag**gataa**attcctgtaaacacatttgcctcagagcttcaatttcttcttct

**Figure S4 (part 4).** Structure of *CATHL* genes and corresponding preprocathecidins of *Vicugna pacos*. Predicted intron/exon boundaries are highlighted in red. Exons are highlighted in green. Signal peptide sequences are marked in yellow/black. Signal peptide sequence identified with SignalP 5.0 ([www.cbs.dtu.dk/services/SignalP/](http://www.cbs.dtu.dk/services/SignalP/)). Peptide sequences of putative mature cathelicidins are marked with red font. The TATA-box signal is in bold and grey marked and the polyadenylation signal is in italics and grey marked.



|              |                                                                                   |      |
|--------------|-----------------------------------------------------------------------------------|------|
| SbmA (wt)    | ATGTTTAAAGTCTTTTTTCCCAAAGCCGGGAATGTTTTTCTCTCGGCCCTTGTGTTGGGCATTGATTGCCGTATCTTCTG  | 80   |
| SbmA (mut)   | ATGTTTAAAGTCTTTTTTCCCAAAGCCGGGAATGTTTTTCTCTCGGCCCTTGTGTTGGGCATTGATTGCCGTATCTTCTG  | 80   |
| Gap fraction |                                                                                   |      |
| SbmA (wt)    | GCAAGTCGGTGGGGTGATTGGGTGGCGCGTATCACCGGCGCTTCCGGGCAGATCCCGATTAGCGCCGCGCGTTTCTGGT   | 160  |
| SbmA (mut)   | GCAAGTCGGTGGGGTGATTGGGTGGCGCGTATCACCGGCGCTTCCGGGCAGATCCCGATTAGCGCCGCGCGTTTCTGGT   | 160  |
| Gap fraction |                                                                                   |      |
| SbmA (wt)    | CGTTGGATTTCTGATTTTTTACGCTTACTACATTGTTTGCCTAGGACTTTTTGCATTGTTCTGGTTTATCTATAGCCCG   | 240  |
| SbmA (mut)   | CGTTGGATTTCTGATTTTTTACGCTTACTACATTGTTTGCCTAGGACTTTTTGCATTGTTCTGGTTTATCTATAGCCCG   | 240  |
| Gap fraction |                                                                                   |      |
| SbmA (wt)    | CACCGTTGGCAATACTGGTCAATACTCGGTACTGCGCTGATTATCTTCGTACCTGGTTTTTGGTGAAGTCGGGGTTGC    | 320  |
| SbmA (mut)   | CACCGTTGGCAATACTGGTCAATACTCGGTACTGCGCTGATTATCTTCGTACCTGGTTTTTGGTGAAGTCGGGGTTGC    | 320  |
| Gap fraction |                                                                                   |      |
| SbmA (wt)    | CGTCAACGCCTGGTATGCGCCGTTCTATGATCTGATTCAAACGGCGCTAAGTTCGCCGCATAAAGTCACCATCGAACAAT  | 400  |
| SbmA (mut)   | CGTCAACGCCTGGTATGCGCCGTTCTATGATCTGATTCAAACGGCGCTAAGTTCGCCGCATAAAGTCACCATCGAACAAT  | 400  |
| Gap fraction |                                                                                   |      |
| SbmA (wt)    | TTTACC GCGAAGTGGCGCTCTTTCTGGGGATTGCGCTGATCGCGGTGGTGATCAGTGTGCTGAACAACCTCTTTGTCAGT | 480  |
| SbmA (mut)   | TTTACC GCGAAGTGGCGCTCTTTCTGGGGATTGCGCTGATCGCGGTGGTGATCAGTGTGCTGAACAACCTCTTTGTCAGT | 480  |
| Gap fraction |                                                                                   |      |
| SbmA (wt)    | CACTACGTGTTCCGCTGGCGTACGGCGATGAACGAATATTACATGGCGAACTGGCAACAACGCGTCATATCGAAGGGGC   | 560  |
| SbmA (mut)   | CACTACGTGTTCCGCTGGCGTACGGCGATGAACGAATATTACATGGCGAACTGGCAACAACGCGTCATATCGAAGGGGC   | 560  |
| Gap fraction |                                                                                   |      |
| SbmA (wt)    | CGCGCAGCGTGTGCAGGAAGACACCATGCGTTTTGCTTCAACGCTGGAGAATATGGGCGTCAGCTTTATCAACGCTATCA  | 640  |
| SbmA (mut)   | CGCGCAGCGTGTGCAGGAAGACACCATGCGTTTTGCTTCAACGCTGGAGAATATGGGCGTCAGCTTTATCAACGCTATCA  | 640  |
| Gap fraction |                                                                                   |      |
| SbmA (wt)    | TGACGTTGATCGCCTTCCTGCCGGTGCTGGTAACGCTCTCCGCACATGTGCCGGAGCTGCCGATTGTGGGCACATTCCG   | 720  |
| SbmA (mut)   | TGACGTTGATCGCCTTCCTGCCGGTGCTGGTAACGCTCTCCGCACATGTGCCGGAGCTGCCGATTGTGGGCACATTCCG   | 720  |
| Gap fraction |                                                                                   |      |
| SbmA (wt)    | TATGGTCTGGTGATTGCCGCTATCGTCTGGTCTGATGGGGACCGGATTACTGGCAGTGGTAGGGATCAAACGCGGG      | 800  |
| SbmA (mut)   | TATGGTCTGGTGATTGCCGCTATCGTCTGGTCTGATGGGGACCGGATTACTGGCAGTGGTAGGGATCAAACGCGGG      | 800  |
| Gap fraction |                                                                                   |      |
| SbmA (wt)    | GCTGGAGTTTAAAAACGAGCGTGTAGAGGCTGCCTACCGTAAAGAACTGGTTTATGGTGAAGACGATGCCACGCGCGTGA  | 880  |
| SbmA (mut)   | GCTGGAGTTTAAAAACGAGCGTGTAGAGGCTGCCTACCGTAAAGAACTGGTTTATGGTGAAGACGATGCCACGCGCGTGA  | 880  |
| Gap fraction |                                                                                   |      |
| SbmA (wt)    | CGCCGCCTACGGTACGCGAGCTTTTTAGCGCCGTACGGAAAACTATTTCCGCCTCTATTTTCTACTATATGTATTTCAAT  | 960  |
| SbmA (mut)   | CGCCGCCTACGGTACGCGAGCTTTTTAGCGCCGTACGGAAAACTATTTCCGCCTCTATTTTCTACTATATGTATTTCAAT  | 948  |
| Gap fraction |                                                                                   |      |
| SbmA (wt)    | ATCGCCCGCATTTCTCTATTTGCGAGGTCGATAACGTTTTCGGTTTGTCTTGCTGTTTCCGTCAATTGTTGCCGGTACGAT | 1040 |
| SbmA (mut)   | ATCGCCCGCATTTCTCTATTTGCGAGGTCGATAACGTTTTCGGTTTGTCTTGCTGTTTCCGTCAATTGTTGCCGGTACGAT | 1028 |
| Gap fraction |                                                                                   |      |
| SbmA (wt)    | TACACTCGGCCTGATGACGCAGATTACTAACGTTTTTGGTCAGGTTTCGCGGTGCTTTCCAGTACCTGATTAACATCATGA | 1120 |
| SbmA (mut)   | TACACTCGGCCTGATGACGCAGATTACTAACGTTTTTGGTCAGGTTTCGCGGTGCTTTCCAGTACCTGATTAACATCATGA | 1108 |
| Gap fraction |                                                                                   |      |
| SbmA (wt)    | CCACACTGGTTGAGTTGATGTCTATCTACAAACGCTGCGCAGCTTTGAACATGAGCTGGATGGTGACAAAATTCAGGAA   | 1200 |
| SbmA (mut)   | CCACACTGGTTGAGTTGATGTCTATCTACAAACGCTGCGCAGCTTTGAACATGAGCTGGATGGTGACAAAATTCAGGAA   | 1188 |
| Gap fraction |                                                                                   |      |
| SbmA (wt)    | GTAACCCATACCTTGAGCTAA                                                             | 1221 |
| SbmA (mut)   | GTAACCCATACCTTGAGCTAA                                                             | 1209 |
| Gap fraction |                                                                                   |      |

**Figure S5.** Alignment of nucleotide sequences of genes encoding SbmA from *E. coli* MDR CI 1057 "wt" (wild type) and mutant SbmA from VicBac[1-22]-resistant *E. coli* MDR CI 1057 "mut" obtained after selection. Nucleotide deletion is highlighted with red.

**Table S1.** Amino acid sequences and molecular masses of the peptides used in this study

| Peptide      | Origin | Sequence                                 | Molecular mass, Da                                     |                                |
|--------------|--------|------------------------------------------|--------------------------------------------------------|--------------------------------|
|              |        |                                          | Calculated<br>[M+H] <sup>+</sup><br>value <sup>1</sup> | Measured<br>value <sup>2</sup> |
| Bac7[1-22]   | Rec    | RRIRPRPPRLPRPRPRPLPFPR                   | 2783.72                                                | 2783.89                        |
| PR-39[1-22]  | Rec    | RRRPRPPYLPRPRPPFFFPRL                    | 2765.61                                                | 2765.35                        |
| VicBac[1-14] | Rec    | RRIRRPRLPRPRVP                           | 1825.17                                                | 1824.96                        |
| VicBac[1-16] | Rec    | RRIRRPRLPRPRVPRP                         | 2078.32                                                | 2078.05                        |
| VicBac[1-18] | Rec    | RRIRRPRLPRPRVPRPRI                       | 2347.51                                                | 2347.25                        |
| VicBac[1-20] | Rec    | RRIRRPRLPRPRVPRPRIPP                     | 2541.61                                                | 2541.52                        |
| VicBac[1-22] | Rec    | RRIRRPRLPRPRVPRPRIPPRI                   | 2810.80                                                | 2810.84                        |
| VicBac[1-39] | Synt   | RRIRRPRLPRPRVPRPRIPPRIPRPVLPFPRVPFPRFPR* | 4815.98                                                | 4815.70                        |
| Melittin     | Synt   | GIGAVLKVLTTGLPALISWIKRKRQQ               | 2846.74                                                | 2846.60                        |
| LL-37        | Synt   | LLGDFFRKSKEKIGKEFKRIVQRIKDFLRNLPRTES     | 4491.58                                                | 4491.40                        |

Rec – recombinant peptide

Synt – synthetic peptide

\* C-terminal amidation

<sup>1</sup> according to Expasy Isotopident tool

<sup>2</sup> monoisotopic m/z were measured using MALDI-TOF MS

**Table S2.** Amino acid sequences of natural cathelicidins from *Camelidae* species

| Animal                                     | Sequence                             | GenBank ID                                         |
|--------------------------------------------|--------------------------------------|----------------------------------------------------|
| <b>Vp22-like cathelicidins</b>             |                                      |                                                    |
| <i>Camelus dromedarius</i>                 | KIINLPWRPPRRKRPIRVIYV                | JWIN01013794.1<br>LSZX01138262.1                   |
| <i>Camelus ferus</i>                       | KIINLPWRPPRRKRPIRVIYV                | AGVR01057826.1                                     |
| <i>Camelus bactrianus</i>                  | KIINLPWRPPRRKRPIRVIYV                | JARL01035148.1                                     |
| <i>Vicugna pacos</i>                       | KVINLLWRPPRRQRPPRLIYV                | JEMW01023459.1                                     |
| <i>Vicugna vicugna</i>                     | KVINLLWRPPRRQRPPRLIYV                | PNXW01017670.1<br>JEMW01026878.1                   |
| <i>Lama guanicoe</i>                       | KVINLLWRPPRRQRPPRLIYV                | PNXV01010685.1                                     |
| <i>Lama glama</i>                          | KVINLLWRPPRRQRPPRLIYV                | PNXU01026596.1                                     |
| <b>23-residue cathelicidins (MAP-like)</b> |                                      |                                                    |
| <i>Camelus dromedarius</i>                 | GLFGPILGIVRAGVKLVLDKFGK              | JWIN01033265.1<br>JDVD01079641.1                   |
| <i>Camelus bactrianus</i>                  | GLFGPILGIVRAGVKLVLDKFGK              | JARL01035147.1                                     |
| <i>Lama guanicoe</i>                       | GILGPILRIVAAGLDWLQHKRGK              | PNXV01004884.1                                     |
| <i>Lama glama</i>                          | GILGPILRIVAAGLDWLQHKRGK              | PNXU01036743.1                                     |
| <b>Vp24-like cathelicidins (MAP-like)</b>  |                                      |                                                    |
| <i>Camelus dromedarius</i>                 | GLGRIVRKAIKYVPTVIRIASWFL             | LSZX01137296.1<br>JWIN01015089.1                   |
| <i>Camelus ferus</i>                       | GLGRIVRKAIKYVPTVIRIASWFL             | AGVR01002349.1                                     |
| <i>Camelus bactrianus</i>                  | GLGRIVRKAIKYVPTVIRIASWFL             | JARL01005658.1                                     |
| <i>Vicugna pacos</i>                       | GFGRIVRKAIKYVPTVIRIASWFL             | ABRR02174663.1<br>JEMW01020494.1<br>ABRR02172633.1 |
| <i>Vicugna vicugna</i>                     | GFGRIVRKAIKYVPTVIRIASWFL             | PNXW01014781.1                                     |
| <i>Lama guanicoe</i>                       | GFGRIVRKAIKYVPTVIRIASWFL             | PNXV01005610.1                                     |
| <i>Lama glama</i>                          | GFGRIVRKAIKYVPTVIRIASWFL             | PNXU01002030.1                                     |
| <b>Vp26-like cathelicidins (MAP-like)</b>  |                                      |                                                    |
| <i>Vicugna pacos</i>                       | RSFPRIYGIIRDGLNWVRDNFGRVIG           | JEMW01026878.1                                     |
| <i>Vicugna vicugna</i>                     | RSFPRIYGIIRDGLNWVRDNFGRVIG           | PNXW01021834.1                                     |
| <i>Lama guanicoe</i>                       | RSFPRIFGIIRDGLNWVRDKLGRVIG           | PNXV01022927.1                                     |
| <i>Lama glama</i>                          | RSFPRIFGIIRDGLNWVRDKLGRVIG           | PNXU01023268.1                                     |
| <b>Vp29-like cathelicidins (MAP-like)</b>  |                                      |                                                    |
| <i>Camelus dromedarius</i>                 | GFFKKARNKLKNAWRKVGPIVGPLLTFFG        | JWIN01010394.1<br>LSZX01137298.1                   |
| <i>Camelus ferus</i>                       | GFFKKARNKLKNAWRKVGPIVGPLLTFFG        | AGVR01002349.1                                     |
| <i>Camelus bactrianus</i>                  | GFFKKARNKLKNAWRKVGPIVGPLLTFFG        | JARL01005658.1                                     |
| <i>Vicugna pacos</i>                       | GFFKKARKKLKNAWRKVGPIVGPLLNVFG        | JEMW01020494.1<br>ABRR02172634.1                   |
| <i>Vicugna vicugna</i>                     | GFFKKARKKLKNAWRKVGPIVGPLLNVFG        | PNXW01014781.1                                     |
| <i>Lama guanicoe</i>                       | GFFKKARKKLKNAWRKVGPIVGPLLNVFG        | PNXV01005610.1                                     |
| <i>Lama glama</i>                          | GFFKKARKKLKNAWRKVGPIVGPLLNVFG        | PNXU01002030.1                                     |
| <b>Vp38-like cathelicidins</b>             |                                      |                                                    |
| <i>Camelus dromedarius</i>                 | RGFFPPPPFPPGPFPPPPFPIPPFPPFPRPFVRRRR | JDVD01002168.1<br>JWIN01034589.1                   |
| <i>Camelus ferus</i>                       | RGFFPPPPFPPGPFPPPPFPIPPFPPFPRPFVRRRR | AGVR01053365.1                                     |
| <i>Camelus bactrianus</i>                  | RGFFPPPPFPPGPFPPPPFPIPPFPPFPRPFVRRRR | JARL01035147.1                                     |
| <i>Vicugna pacos</i>                       | RRFFPRPFPPGPFPPPPFPIPPFPPFPGPIIRGRR  | JEMW01019668.1                                     |

|                                                         |                                                                                                            |                                  |
|---------------------------------------------------------|------------------------------------------------------------------------------------------------------------|----------------------------------|
|                                                         |                                                                                                            | ABRR02179311.1                   |
| <i>Vicugna vicugna</i>                                  | RRFFPRPFPFPGFPPFPFPIPIPIPFPGPIIRGRR                                                                        | PNXW01021834.1                   |
| <i>Lama guanicoe</i>                                    | RRFFPGFPPPGFPPFPFPIPIPIPFPGPIIRGRR                                                                         | PNXV01010688.1                   |
| <i>Lama glama</i>                                       | RRFFPGFPPPGFPPFPFPIPIPIPFPGPIIRGRR                                                                         | PNXU01023268.1                   |
| <b>Bac7-like cathelicidins (VicBac, CamBac, LamBac)</b> |                                                                                                            |                                  |
| <i>Camelus dromedarius</i>                              | RSIRRPRLPRPRVPRPYIPPRIPRPVLPFPPRFPIPRFPRGR                                                                 | JDVD01078062.1                   |
| <i>Camelus ferus</i>                                    | RSIRRPRLPRPRVPRPYIPPRIPRPVLPFPPRFPIPRFPRGR                                                                 | AGVR01053366.1                   |
| <i>Camelus bactrianus</i>                               | RSIRRPRLPRPRVPRPYIPPRIPRPVLPFPPRFPIPRFPRGR                                                                 | JARL01035149.1                   |
| <i>Vicugna pacos</i>                                    | RRIRRPRLPRPRVPRPRIPPRIPRPVLPFPPRVFPFPRFPRGR                                                                | JEMW01005218.1<br>ABRR02002833.1 |
| <i>Vicugna vicugna</i>                                  | RRIRRPRLPRPRVPRPRIPPRIPRPVLPFPPRVFPFPRFPRGR                                                                | PNXW01021835.1                   |
| <i>Lama guanicoe</i>                                    | RRIRRPRLPRPRVPRPHIPPRIPRPVLPFPPRVFPFRLRRR                                                                  | PNXV01010685.1                   |
| <i>Lama glama</i>                                       | RRIRRPRLPRPRVPRPHIPPRIPRPVLPFPPRVFPFRLRRR                                                                  | PNXU01024686.1                   |
| <b>Prophenin-like cathelicidins</b>                     |                                                                                                            |                                  |
| <i>Camelus dromedarius</i>                              | RFPVFNFPFPPNFPPQFPPNFPPRFPPNFPPNFPPPE<br>FPLNFPPNFPPPEFPLNFPPPI                                            | JDVD01076911.1                   |
| <i>Camelus dromedarius</i>                              | RFPAPNFPPNFPPPEFPLNFPPNFPPPEFPLNFPLNF<br>FPPNFPPQFPPNFPPRFPPNFPPNFPPNFPPPEFPLNF<br>PPNFPPPEFPLNFPPPI       | JWIN01034417.1<br>LSZX01137301.1 |
| <i>Camelus ferus</i>                                    | RFPAPNFPPNFPPRFPPNFPPNFPPNFPPPEFPLNF<br>FPPNFPPPEFPLNFPPPI                                                 | AGVR01059010.1                   |
| <i>Camelus bactrianus</i>                               | RFPAPNFPPNFPPRFPPNFPPNFPPNFPPPEFPLNF<br>FPLNFPPNFPPRFPPNFPPNFPPNFPPPEFPLNF<br>PPNFPPPEFPLNFPPPI            | JARL01005656.1                   |
| <i>Vicugna pacos</i>                                    | SFPPNFPPNFPPPEFPPNFPPNFPPRFPPNFPPNF<br>PPPEFPLQNFPPPI                                                      | ABRR02179514.1                   |
| <i>Vicugna vicugna</i>                                  | SFPPNFPPNFPPPEFPLQNFPPPI                                                                                   | PNXW01021834.1                   |
| <i>Vicugna vicugna</i>                                  | SFPPNFPRFPFPPNFPPRFPPNFPPRFPPNFPPRF<br>PPDFPPRFPPDFPPRFPPNFPPRFPPNFPPNFPP<br>PEFPPNFPPNFPPNFPPPEFPLQNFPPPI | PNXW01017671.1                   |
| <i>Lama guanicoe</i>                                    | SFPPNFPRFPFPPNFPRFPFPPNFPPRFPPNFPPRF<br>PPNFPPNFPPNFPPRFPPNFPPPEFPPNFPPNF<br>PPNFPPPEFPLQNFPPPI            | PNXV01010685.1                   |
| <b>Vp35-like cathelicidins (MAP-like)</b>               |                                                                                                            |                                  |
| <i>Camelus dromedarius</i>                              | GLFGRIRDFHHDGVNWVRDKVGKVIYIGDKIRPG                                                                         | JWIN01007525.1                   |
| <i>Camelus dromedarius</i>                              | GLFGRIRDSIRNRVNRVRDAIGKVIYVGDKIRPG                                                                         |                                  |
| <i>Camelus ferus</i>                                    | GLFGRIRDFHHDGVNWVRDKVGKVIYIGDKIRPG                                                                         | AGVR01065784.1                   |
| <i>Camelus bactrianus</i>                               | GLFGRIRDFHHDGVNWVRDKVGKVIYIGDKIRPG                                                                         | JARL01035150.1                   |
| <i>Camelus bactrianus</i>                               | GLFGRIRDSIRKRVNRVRDAIGKVIYVGDKIRPG                                                                         | JARL01005655.1                   |
| <i>Vicugna pacos</i>                                    | GFFGRIHDFFRDGVNWVRDKVGKVIYIGDKIRPG                                                                         | JEMW01026878.1<br>ABRR02002839.1 |
| <i>Vicugna vicugna</i>                                  | GFFGRIHDFFRDGVNWVRDKVGKVIYIGDKIRPG                                                                         | PNXW01021834.1                   |
|                                                         | GVFGRIRNFFRDRVNRVRDTVGVKVIYIGDKIRPG                                                                        | PNXW01021834.1                   |
| <i>Lama guanicoe</i>                                    | GFFGGIRDFFRDGVNRVRDTVGVKVIYIGDKIRPG                                                                        | PNXV01022928.1                   |
|                                                         | RLFGGIRDFIRDRVNRVRDKVGKVIYIGDKIRPG                                                                         | PNXV01010688.1                   |
| <i>Lama glama</i>                                       | GFFGGIRDFFRDGVNRVRDTVGVKVIYIGDKIRPG                                                                        | PNXU01023268.1                   |
